# Supplementary material
Source: Springer Nature journal article supplement (https://www.springermedizin.de/resource/supplementary/12916_2012_662_MOESM8_ESM.pdf/9597936)

**A**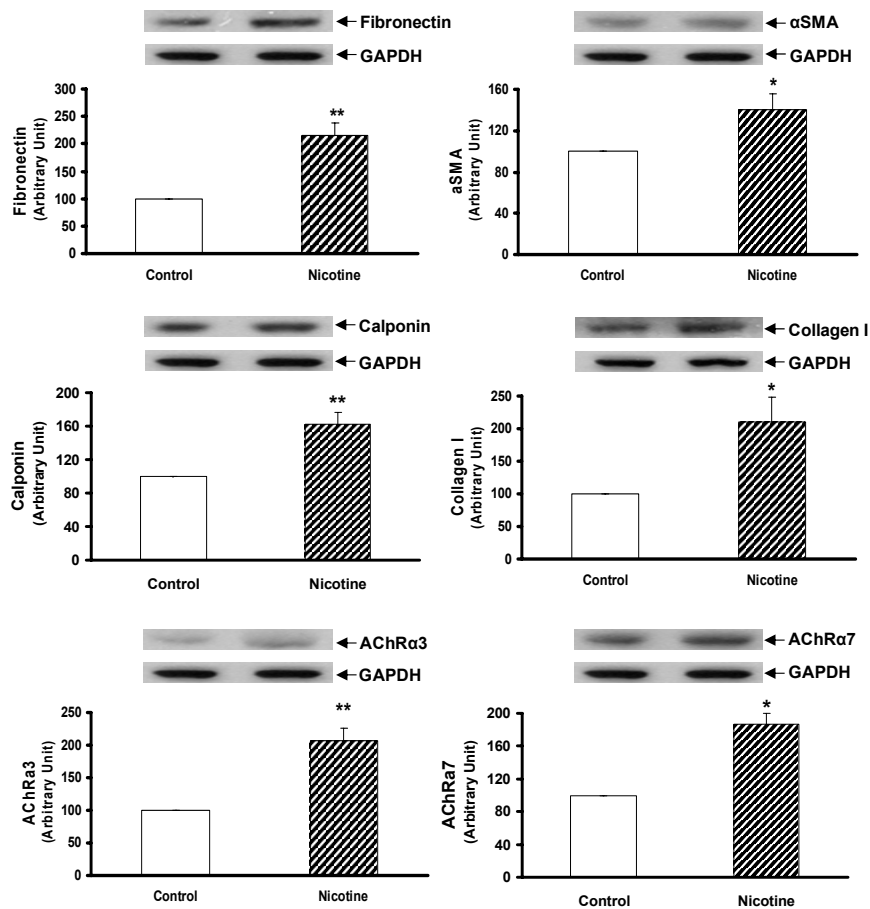**B**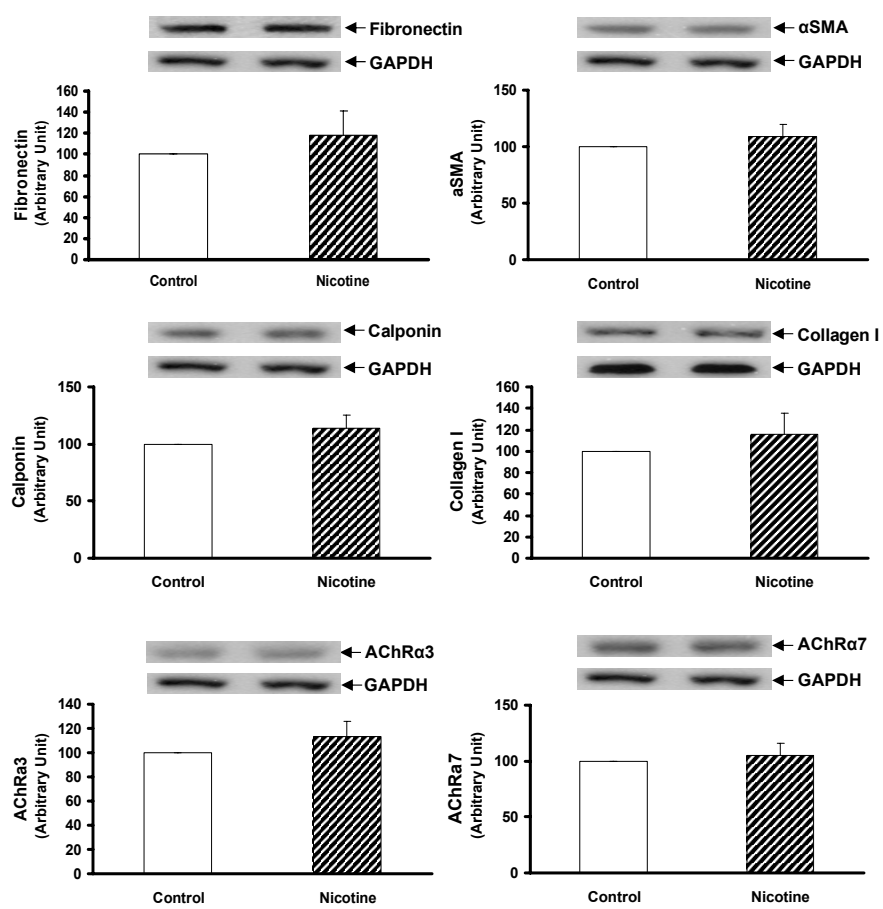

Supplement: MOESM8 [file 9597936]
